# Supplementary material for: A Hierarchical Age–Period–Cohort Analysis of Breast Cancer Mortality and Disability Adjusted Life Years (1990–2015) Attributable to Modified Risk Factors among Chinese Women
Source: Int J Environ Res Public Health. 2020 Feb 20;17(4):1367. doi: 10.3390/ijerph17041367 (PMC7068251; doi:10.3390/ijerph17041367)
Supplement: Supplementary file 1 [file ijerph-17-01367-s001.pdf]

# A Hierarchical Age–Period–Cohort Analysis of Breast Cancer Mortality and Disability Adjusted Life Years (1990–2015) Attributable to Modified Risk Factors among Chinese Women

Sumaira Mubarik, Fang Wang , Saima Shakil Malik , Fang Shi , Yafeng Wang , Nawsherwan and Chuanhua Yu\*

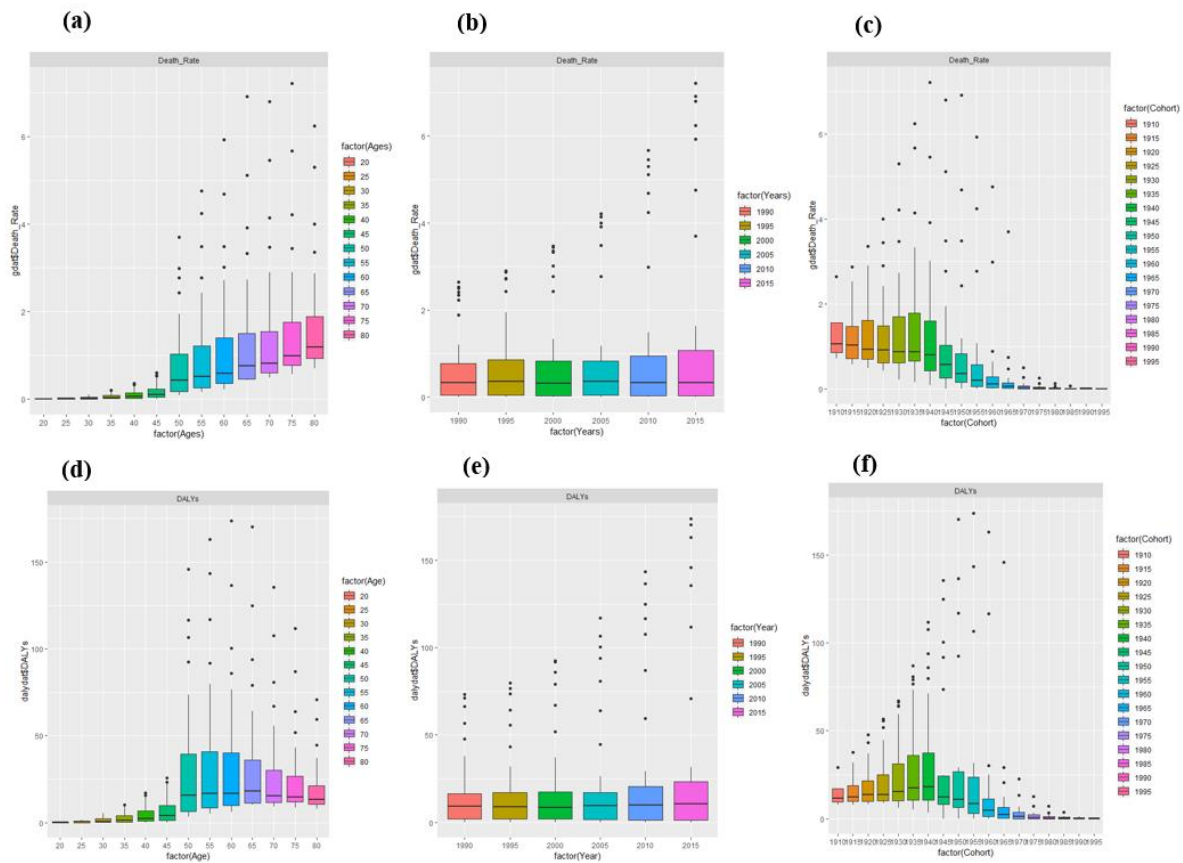

**Figure S1.** Breast cancer Mortality Rates (MRs) and Disability Adjusted Life Years (DALYs) across age (a,d), period (years) (b,e) and cohorts (c,f) attributable to all risk factors together (HBMI, Alcohol use, LowPA and smoking)

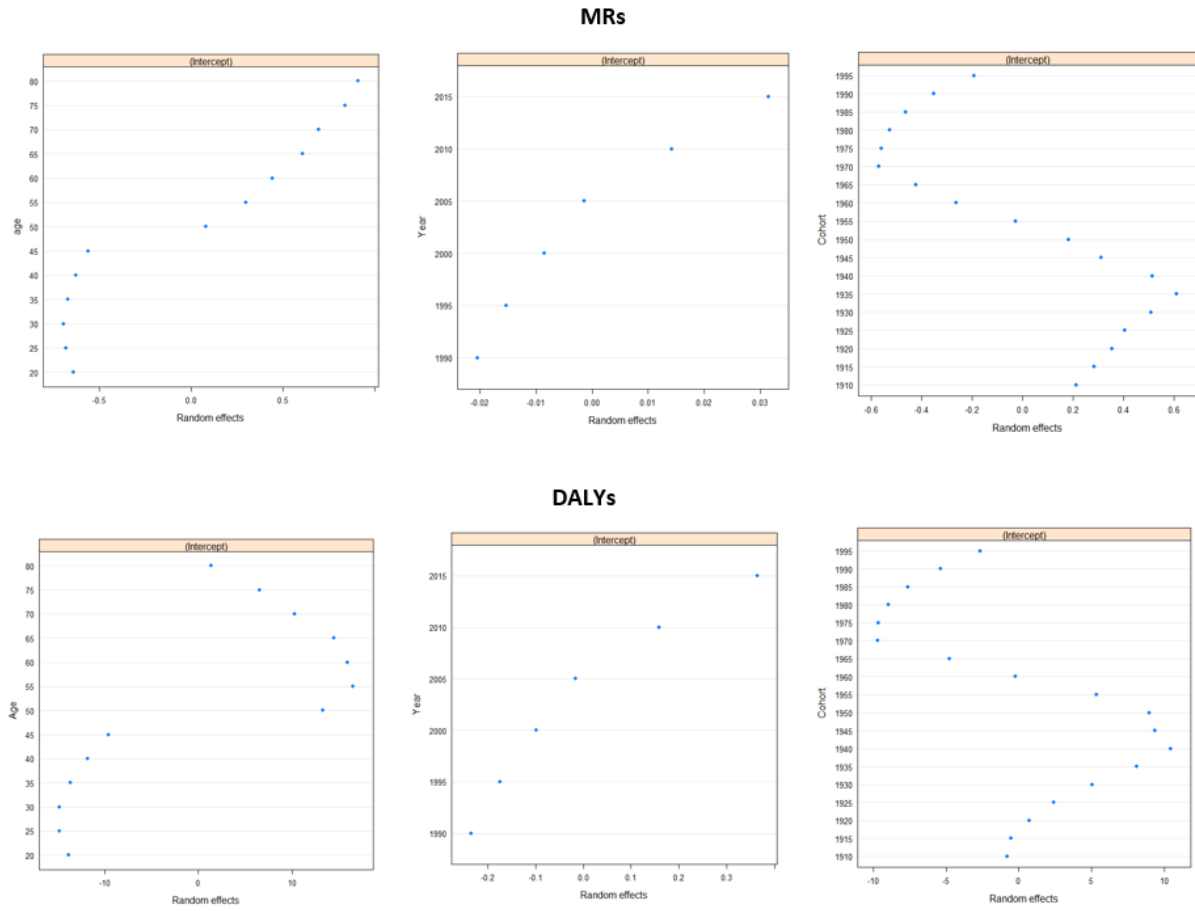

**Figure S2.** Random effects of age, years (period) and cohort on MRs and DALYs from HAPC model for all risk factors (HBMI, Alcohol use, LowPA and smoking)
